# Supplementary material
Source: publisher figshare collection journal article supplement (https://frontiersin.figshare.com/ndownloader/files/17866034)

**Glass Fracture upon Ballistic Impact: New Insights from Peridynamics Simulations**

*Jared Rivera1, Jonathan Berjikian1, R. Ravinder2, Hariprasad Kodamana3, Sumanta Das4, Naresh Bhatnagar5, Mathieu Bauchy1, N. M. Anoop Krishnan2**

1Physics of AmoRphous and Inorganic Solids Laboratory (PARISlab), Department of Civil and Environmental Engineering, University of California, Los Angeles, CA 90095, USA

2Department of Civil Engineering, Indian Institute of Technology Delhi, Hauz Khas, New Delhi 110016, India

3Department of Chemical Engineering, Indian Institute of Technology Delhi, Hauz Khas, New Delhi 110016, India

4Department of Civil and Environmental Engineering, University of Rhode Island, Kingston, RI 02881, USA
5Department of Mechanical Engineering, Indian Institute of Technology Delhi, Hauz Khas, New Delhi 110016, India
*Corresponding authors: N. M. A. Krishnan ([krishnan@iitd.ac.in](mailto:krishnan@iitd.ac.in)) and M. Bauchy ([bauchy@ucla.edu](mailto:Bauchy@ucla.edu))

**Supplementary Material**

1. **Convergence study on horizon size**

In order to choose the appropriate size of horizon, we performed a convergence study with three different horizons, h, namely, 1.5 mm, 2 mm and 2.5 mm, for a fixed lattice parameter, L, of 0.5 mm. These result in h/L ratios of 3, 4, and 5. The evolution of mean damage of the plate with respect to time is shown below. We observe that with increasing horizon, the mean damage in the plate increases. Further, we observe that the difference between the mean damage for a horizon sizes of 2 mm and 2.5 mm is not significantly different. As such, considering the computational cost along with the convergence, we choose a horizon value of 2.0 mm in this work, corresponding to a h/L ratio of 4.


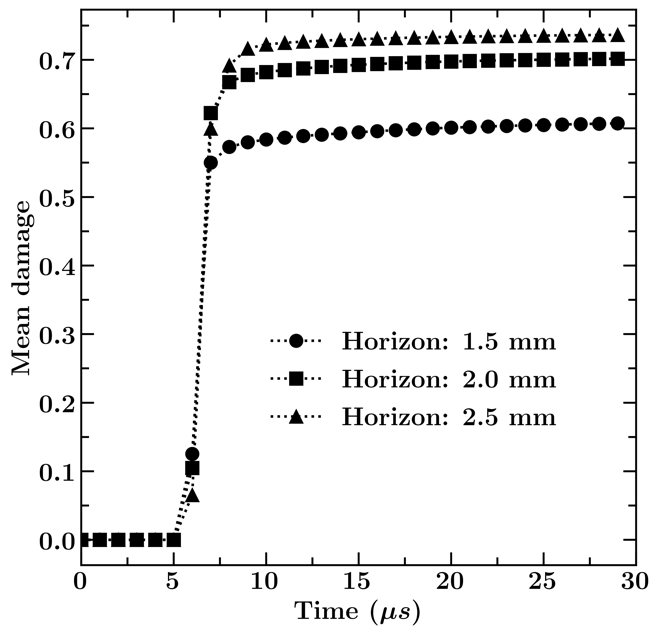


**Figure S1.** Evolution of damage with respect to time for three different horizon values.

1. **Effect of damage cutoff on crack velocity computation**

In order to get a fully separated crack, one may need fewer than 50% of the bonds to fail. As such, points with damage lower than 0.5 may also be part of a cracked surface. However, in the present study, we are primarily interested in obtaining the velocity of crack propagation. Hence, the exact value of damage as long as the velocity obtained is consistent. To compute the optimum value of damage, we compute the crack velocity using different damage cutoffs per lattice point, namely, 0.3, 0.4, 0.5, and 0.6 as shown below. For each of the damage cutoff, we calculate the position of the radial crack and the corresponding time. In order to ensure the statistical relevance, we compute the velocity of four different cracks for a given damage cutoff. Figure S2 shows the radial distance of crack with respect to time for different damage cutoffs. Corresponding cracks, named as 1, 2, 3, and 4, are shown in Figs. (a-2), (b-2), (c-2), and (d-2). We observe that the average velocity of the crack corresponding to the damage cutoffs of 0.3, 0.4, 0.5, and 0.6, are 3105, 3073, 3090, and 3188 m/s, respectively. This confirms that although the choice of 0.5 to detect the crack may not result in a fully separated crack, this can still be used reliably obtain the crack velocity.


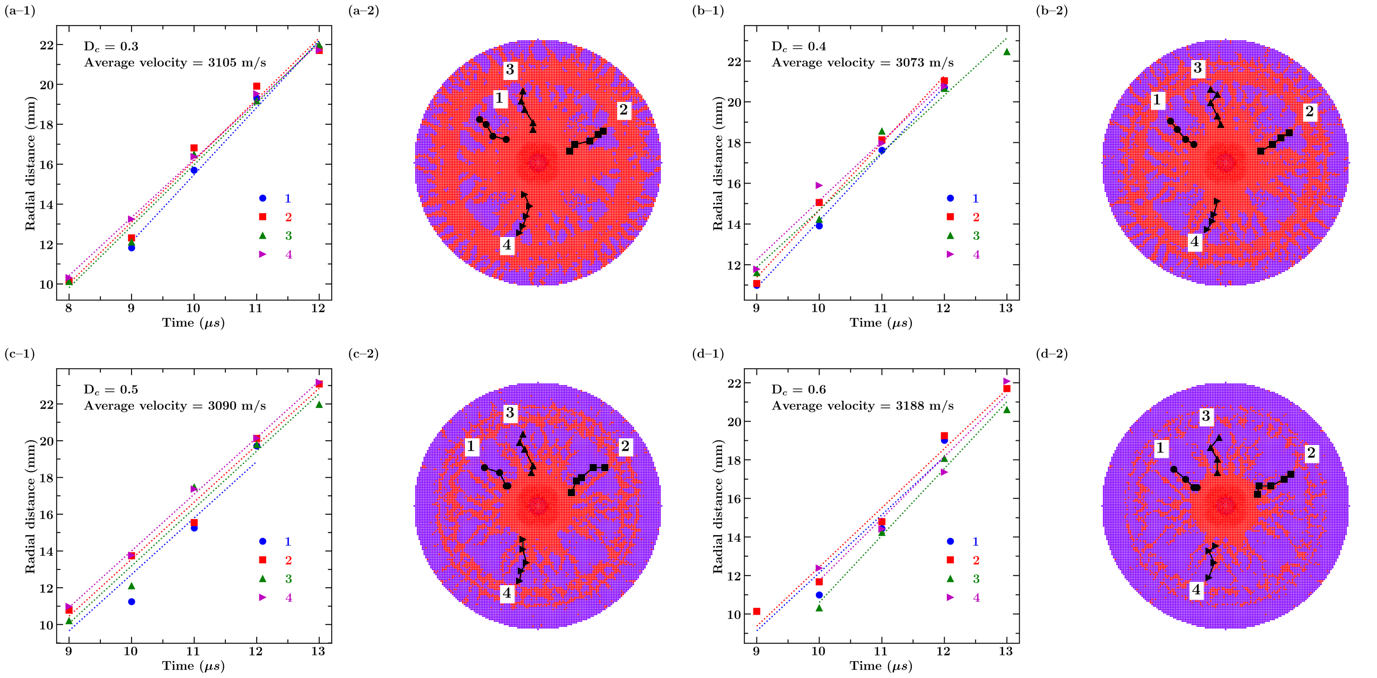

Supplement: Supplementary file 1 [file 17866034]
